# Supplementary material for: Pathway Analysis of Smoking Quantity in Multiple GWAS Identifies Cholinergic and Sensory Pathways
Source: PubMed Central journal article supplement (PMC3515482; doi:10.1371/journal.pone.0050913), 2012-12-05
Supplement: pone.0050913.s004.pdf [file pone.0050913.s004.pdf]

**Table S1.**

| A)               |           | GO term enrichment threshold |          |       |          |       |          |
|------------------|-----------|------------------------------|----------|-------|----------|-------|----------|
|                  |           | 0.005                        |          | 0.01  |          | 0.05  |          |
| SNP<br>Threshold | Study     | #cat.                        | p-value  | #cat. | p-value  | #cat. | p-value  |
| 0.001            | OZALC-NAG | 23                           | 1.20E-03 | 35    | 4.40E-03 | 101   | 1.02E-02 |
|                  | SAGE      | 15                           | 6.40E-03 | 34    | 2.20E-03 | 119   | 4.60E-03 |
| 0.005            | OZALC-NAG | 18                           | 3.18E-02 | 26    | 9.02E-02 | 139   | 9.40E-02 |
|                  | SAGE      | 11                           | 1.37E-01 | 34    | 1.20E-01 | 179   | 2.44E-02 |
| 0.01             | OZALC-NAG | 19                           | 8.84E-02 | 37    | 9.12E-02 | 163   | 1.62E-01 |
|                  | SAGE      | 21                           | 7.46E-02 | 41    | 8.74E-02 | 192   | 1.01E-01 |
| 0.05             | OZALC-NAG | 33                           | 3.44E-02 | 62    | 4.60E-02 | 262   | 2.33E-01 |
|                  | SAGE      | 42                           | 1.80E-02 | 81    | 3.10E-02 | 313   | 5.78E-02 |

  

| B)               |           | KEGG pathways enrichment threshold |          |       |          |       |          |
|------------------|-----------|------------------------------------|----------|-------|----------|-------|----------|
|                  |           | 0.005                              |          | 0.01  |          | 0.05  |          |
| SNP<br>Threshold | Study     | #cat.                              | p-value  | #cat. | p-value  | #cat. | p-value  |
| 0.001            | OZALC-NAG | 1                                  | 2.80E-03 | 1     | 1.16E-02 | 1     | 1.76E-01 |
|                  | SAGE      | 0                                  | 1.00E+00 | 1     | 7.80E-03 | 3     | 1.80E-03 |
| 0.005            | OZALC-NAG | 0                                  | 1.00E+00 | 1     | 7.00E-02 | 8     | 7.70E-02 |
|                  | SAGE      | 0                                  | 1.00E+00 | 1     | 7.44E-02 | 2     | 5.54E-01 |
| 0.01             | OZALC-NAG | 0                                  | 1.00E+00 | 0     | 1.00E+00 | 12    | 4.62E-02 |
|                  | SAGE      | 0                                  | 1.00E+00 | 0     | 1.00E+00 | 5     | 3.48E-01 |
| 0.05             | OZALC-NAG | 6                                  | 8.00E-04 | 10    | 1.20E-03 | 19    | 1.54E-02 |
|                  | SAGE      | 4                                  | 3.20E-03 | 4     | 2.60E-02 | 13    | 8.40E-02 |
