# Supplementary material for: Pathway Analysis of Smoking Quantity in Multiple GWAS Identifies Cholinergic and Sensory Pathways
Source: PubMed Central journal article supplement (PMC3515482; doi:10.1371/journal.pone.0050913), 2012-12-05
Supplement: pone.0050913.s005.pdf [file pone.0050913.s005.pdf]

**Table S2**

| acc        | name                                                                | # Genes<br>Cat. | OZALC-NAG |                |          | SAGE    |                |          | ARIC    |                |          | Combined        |
|------------|---------------------------------------------------------------------|-----------------|-----------|----------------|----------|---------|----------------|----------|---------|----------------|----------|-----------------|
|            |                                                                     |                 | # Genes   | <i>p-value</i> | Expected | # Genes | <i>p-value</i> | Expected | # Genes | <i>p-value</i> | Expected | <i>p-value*</i> |
| GO:0035095 | behavioral response to nicotine                                     | 7               | 3         | 2.00E-05       | 0.034    | 2       | 2.60E-04       | 0.028    | 3       | 2.00E-05       | 0.032    | 2.97E-10        |
| GO:0004889 | nicotinic acetylcholine-activated cation-selective channel activity | 17              | 4         | 2.00E-05       | 0.114    | 2       | 4.20E-03       | 0.095    | 4       | 2.00E-05       | 0.000    | 1.33E-09        |
| GO:0005892 | nicotinic acetylcholine-gated receptor-channel complex              | 16              | 4         | 2.00E-05       | 0.114    | 2       | 4.20E-03       | 0.095    | 4       | 2.00E-05       | 0.000    | 1.33E-09        |
| GO:0042166 | acetylcholine binding                                               | 22              | 4         | 4.00E-05       | 0.125    | 2       | 5.56E-03       | 0.105    | 4       | 4.00E-05       | 0.000    | 5.99E-09        |
| GO:0015464 | acetylcholine receptor activity                                     | 18              | 4         | 4.00E-05       | 0.110    | 2       | 4.16E-03       | 0.093    | 3       | 2.80E-04       | 0.000    | 4.74E-08        |
| GO:0035094 | response to nicotine                                                | 20              | 3         | 2.16E-03       | 0.263    | 2       | 2.13E-02       | 0.225    | 3       | 1.82E-03       | 0.002    | 2.11E-05        |
| GO:0007274 | neuromuscular synaptic transmission                                 | 15              | 2         | 2.75E-02       | 0.256    | 2       | 2.10E-02       | 0.218    | 2       | 2.50E-02       | 0.025    | 2.56E-03        |
