# Supplementary material for: Pathway Analysis of Smoking Quantity in Multiple GWAS Identifies Cholinergic and Sensory Pathways
Source: PubMed Central journal article supplement (PMC3515482; doi:10.1371/journal.pone.0050913), 2012-12-05
Supplement: pone.0050913.s006.pdf [file pone.0050913.s006.pdf]

**Table S3**

|        | <u>OZALC-NAG</u> | <u>SAGE</u> | <u>ARIC</u> |
|--------|------------------|-------------|-------------|
| CHRNA5 | rs16969968       | rs16969968  | rs569207    |
| CHRNA3 | rs16969968       | rs16969968  | rs569207    |
| CHRNA4 | rs6495309        | rs6495309   | rs8040868   |
| CHRNA6 | rs4950           | rs1530848   | rs4950      |
| CHRNA9 | rs16891604       |             | rs7012713   |
| CHRNA7 | rs4861079        | rs4469115   | rs10021263  |
| CHRNA2 | rs904951         | rs4779969   | rs11858834  |
| CHRM5  | rs6557999        | rs9773817   |             |
| CHRM3  | rs8035805        |             |             |
| CHRNA2 | rs2355228        |             |             |
| CHRM2  | rs1127313        |             |             |
| CHRM4  | rs17506733       |             | rs12574668  |
| CHRM1  |                  | rs12418496  | rs12418496  |
| CHRNA4 |                  | rs3787138   |             |
| CHRNA4 |                  | rs733603    |             |
| CHRNA4 |                  | rs733603    |             |
