# Supplementary material for: Pathway Analysis of Smoking Quantity in Multiple GWAS Identifies Cholinergic and Sensory Pathways
Source: PubMed Central journal article supplement (PMC3515482; doi:10.1371/journal.pone.0050913), 2012-12-05
Supplement: pone.0050913.s007.pdf [file pone.0050913.s007.pdf]

**Table S4**

| <b>Acc</b> | <b>Name</b>                                                         | <b>OZALC-NAG<br/><i>q-value</i></b> | <b>SAGE<br/><i>q-value</i></b> | <b>ARIC<br/><i>q-value</i></b> |
|------------|---------------------------------------------------------------------|-------------------------------------|--------------------------------|--------------------------------|
| GO:0035095 | behavioral response to nicotine                                     | 1.90E-01                            | 9.89E-02                       | 5.34E-02                       |
| GO:0060084 | synaptic transmission involved in micturition                       | 4.53E-01                            | 8.14E-02                       | 6.34E-02                       |
| GO:0006942 | regulation of striated muscle contraction                           | 5.15E-01                            | 2.25E-01                       | 1.00E+00                       |
| GO:0004889 | nicotinic acetylcholine-activated cation-selective channel activity | 1.00E+00                            | 3.90E-01                       | 6.03E-02                       |
| GO:0005892 | nicotinic acetylcholine-gated receptor-channel complex              | 5.42E-01                            | 3.51E-01                       | 4.86E-02                       |
| GO:0015464 | acetylcholine receptor activity                                     | 1.70E-01                            | 7.23E-01                       | 8.54E-02                       |
| GO:0005230 | extracellular ligand-gated ion channel activity                     | 5.09E-01                            | 4.55E-01                       | 3.86E-01                       |
| GO:0007271 | synaptic transmission, cholinergic                                  | 4.77E-01                            | 5.83E-01                       | 3.23E-01                       |
| GO:0042060 | wound healing                                                       | 4.93E-01                            | 4.53E-01                       | 8.11E-01                       |
| GO:0006940 | regulation of smooth muscle contraction                             | 5.88E-01                            | 4.90E-01                       | 5.77E-01                       |
| GO:0005216 | ion channel activity                                                | 6.65E-01                            | 4.07E-01                       | 6.97E-01                       |
| GO:0042552 | myelination                                                         | 5.96E-01                            | 4.75E-01                       | 9.04E-01                       |
| GO:0007257 | activation of JUN kinase activity                                   | 6.30E-01                            | 3.59E-01                       | 8.35E-01                       |
| GO:0006548 | histidine catabolic process                                         | 6.33E-01                            | 4.00E-01                       | 7.10E-01                       |
| GO:0034185 | apolipoprotein binding                                              | 6.30E-01                            | 4.21E-01                       | 9.97E-01                       |
| GO:0007265 | Ras protein signal transduction                                     | 7.52E-01                            | 4.46E-01                       | 1.00E+00                       |
