# Supplementary material for: Pathway Analysis of Smoking Quantity in Multiple GWAS Identifies Cholinergic and Sensory Pathways
Source: PubMed Central journal article supplement (PMC3515482; doi:10.1371/journal.pone.0050913), 2012-12-05
Supplement: pone.0050913.s008.pdf [file pone.0050913.s008.pdf]

**Table S5**

| <b>acc</b> | <b>Category of gene</b>                                             | <b>OZALC-NAG</b> | <b>SAGE</b> | <b>ARIC</b> |
|------------|---------------------------------------------------------------------|------------------|-------------|-------------|
| GO:0042166 | acetylcholine binding                                               | 1.00E-03         | 1.00E-03    | 1.00E-02    |
| GO:0015464 | acetylcholine receptor activity                                     | 5.00E-03         | 2.60E-03    | 6.20E-03    |
| GO:0004889 | nicotinic acetylcholine-activated cation-selective channel activity | 4.00E-03         | 1.00E-03    | 2.90E-02    |
| GO:0005892 | nicotinic acetylcholine-gated receptor-channel complex              | 4.00E-03         | 1.00E-03    | 2.90E-02    |
| GO:0004984 | olfactory receptor activity                                         | 2.54E-02         | 1.34E-02    | 2.80E-03    |
| GO:0007608 | sensory perception of smell                                         | 1.14E-01         | 1.91E-01    | 2.58E-01    |
| GO:0007606 | sensory perception of chemical stimulus                             | 9.20E-02         | 1.87E-01    | 1.33E-01    |
