# Supplementary material for: Pathway Analysis of Smoking Quantity in Multiple GWAS Identifies Cholinergic and Sensory Pathways
Source: PLoS One. 2012 Dec 5;7(12):e50913. doi: 10.1371/journal.pone.0050913 (PMC3515482; doi:10.1371/journal.pone.0050913)
Supplement: Text S3 — Statistical analysis. (DOCX) [file pone.0050913.s011.docx]

**Pathway analysis of smoking quantity in multiple GWAS identifies cholinergic and sensory pathways**

Oscar Harari PhD1, Jen-Chyong Wang PhD1, Kathleen Bucholz PhD1, Howard J. Edenberg PhD2, Andrew Heath DPhil1, Nicholas G. Martin PhD3, Michele L. Pergadia PhD1, Grant Montgomery PhD4, Andrew Schrage MS1, Laura J. Bierut MD1, Pamela F. Madden PhD1,and Alison M. Goate DPhil1,*

1Department of Psychiatry, Washington University School of Medicine, St. Louis, Missouri, USA

2 Department of Biochemistry and Molecular Biology, School of Medicine, Indiana University, Indianapolis, Indiana

3 Genetic Epidemiology, Queensland Institute of Medical Research, Brisbane, Australia

4 Molecular Epidemology, Queensland Institute of Medical Research, Brisbane, Australia

Supporting Text S3 - Statistical analysis

Association p-values were calculated for unrelated samples datasets (SAGE and ARIC) employing linear regression models implemented in PLINK v1.07 1, including gender as a covariate. In the case of the SAGE dataset, we also adjusted for alcohol and cocaine dependence and age, which was represented as quartiles (<35; 35-40; 40-45; and ≥45) 2. We employed MERLIN v1.1.2 3 to perform the association test for the family-based OZALC-NAG dataset (fastAssoc option), adjusting for age and gender.

**References**

1. Purcell S, Neale B, Todd-Brown K, Thomas L, Ferreira MAR, Bender D, *et al.* PLINK: a tool set for whole-genome association and population-based linkage analyses. *Am J Hum Genet* 2007 Sep.; **81**: 559–575.

2. Bierut LJ, Agrawal A, Bucholz KK, Doheny KF, Laurie C, Pugh E, *et al.* A genome-wide association study of alcohol dependence. *Proc Natl Acad Sci USA* 2010 Mar. 16; **107**: 5082–5087.

3. Abecasis GR, Cherny SS, Cookson WO, Cardon LR. Merlin--rapid analysis of dense genetic maps using sparse gene flow trees. *Nat Genet* 2002 Jan.; **30**: 97–101.
